# Supplementary material for: Long-term cost-effectiveness of health behaviour intervention to manage type 2 diabetes in Nepal
Source: Springer Nature journal article supplement (doi:10.1186/s12916-025-03981-8), 2025-03-11
Supplement: MOESM1 [file 12916_2025_3981_MOESM1_ESM.pdf]

## Additional file 1:

**Table S1: Consolidated Health Economic Evaluation Reporting Standards 2022 (CHEERS) statement**

| Topic                                            | No. | Item                                                                                                                                            | Location where item is reported |
|--------------------------------------------------|-----|-------------------------------------------------------------------------------------------------------------------------------------------------|---------------------------------|
| Title                                            | 1   | Identify the study as an economic evaluation and specify the interventions being compared.                                                      | Page 1                          |
| Abstract                                         | 2   | Provide a structured summary that highlights context, key methods, results, and alternative analyses.                                           | Page 1-3                        |
| Introduction<br>Background and objectives        | 3   | Give the context for the study, the study question, and its practical relevance for decision making in policy or practice.                      | Page 3-4                        |
| Methods<br>Health economic analysis plan         | 4   | Indicate whether a health economic analysis plan was developed and where available.                                                             | Page 4-7                        |
| Study population                                 | 5   | Describe characteristics of the study population (such as age range, demographics, socioeconomic, or clinical characteristics).                 | Page 4-5                        |
| Setting and location                             | 6   | Provide relevant contextual information that may influence findings.                                                                            | Page 4                          |
| Comparators                                      | 7   | Describe the interventions or strategies being compared and why chosen.                                                                         | Page 4-7                        |
| Perspective                                      | 8   | State the perspective(s) adopted by the study and why chosen.                                                                                   | Page 4                          |
| Time horizon                                     | 9   | State the time horizon for the study and why appropriate.                                                                                       | Page 5 and 10                   |
| Discount rate                                    | 10  | Report the discount rate(s) and reason chosen.                                                                                                  | Page 11                         |
| Selection of outcomes                            | 11  | Describe what outcomes were used as the measure(s) of benefit(s) and harm(s).                                                                   | Page 8-11                       |
| Measurement of outcomes                          | 12  | Describe how outcomes used to capture benefit(s) and harm(s) were measured.                                                                     | Page 8-12                       |
| Valuation of outcomes                            | 13  | Describe the population and methods used to measure and value outcomes.                                                                         | Page 11                         |
| Measurement and valuation of resources and costs | 14  | Describe how costs were valued.                                                                                                                 | Page 9                          |
| Currency, price date, and conversion             | 15  | Report the dates of the estimated resource quantities and unit costs, plus the currency and year of conversion.                                 | Page 9                          |
| Rationale and description of model               | 16  | If modelling is used, describe in detail and why used. Report if the model is publicly available and where it can be accessed.                  | Page 5-7                        |
| Analytics and assumptions                        | 17  | Describe any methods for analysing or statistically transforming data, any extrapolation methods, and approaches for validating any model used. | Page 11-12                      |
| Characterising heterogeneity                     | 18  | Describe any methods used for estimating how the results of the study vary for subgroups.                                                       | Page 11-12                      |

|                                                                       |    |                                                                                                                                                                               |            |
|-----------------------------------------------------------------------|----|-------------------------------------------------------------------------------------------------------------------------------------------------------------------------------|------------|
| Characterising distributional effects                                 | 19 | Describe how impacts are distributed across different individuals or adjustments made to reflect priority populations.                                                        | Page 11    |
| Characterising uncertainty                                            | 20 | Describe methods to characterise any sources of uncertainty in the analysis.                                                                                                  | Page 11-12 |
| Approach to engagement with patients and others affected by the study | 21 | Describe any approaches to engage patients or service recipients, the general public, communities, or stakeholders (such as clinicians or payers) in the design of the study. | Page 5-6   |
| Results                                                               |    |                                                                                                                                                                               |            |
| Study parameters                                                      | 22 | Report all analytic inputs (such as values, ranges, references) including uncertainty or distributional assumptions.                                                          | Page 12    |
| Summary of main results                                               | 23 | Report the mean values for the main categories of costs and outcomes of interest and summarise them in the most appropriate overall measure.                                  | Page 12-15 |
| Effect of uncertainty                                                 | 24 | Describe how uncertainty about analytic judgments, inputs, or projections affect findings. Report the effect of choice of discount rate and time horizon, if applicable.      | Page 12-16 |
| Effect of engagement with patients and others affected by the study   | 25 | Report on any difference patient/service recipient, general public, community, or stakeholder involvement made to the approach or findings of the study                       | Page 12-16 |
| Discussion                                                            |    |                                                                                                                                                                               |            |
| Study findings, limitations, generalisability, and current knowledge  | 26 | Report key findings, limitations, ethical or equity considerations not captured, and how these could affect patients, policy, or practice.                                    | Page 17-21 |
| Other relevant information                                            |    |                                                                                                                                                                               |            |
| Source of funding                                                     | 27 | Describe how the study was funded and any role of the funder in the identification, design, conduct, and reporting of the analysis                                            | Page 22    |
| Conflicts of interest                                                 | 28 | Report authors conflicts of interest according to journal or International Committee of Medical Journal Editors requirements.                                                 | Page 22    |

Source: Husereau D, Drummond M, Augustovski F, et al. Consolidated Health Economic Evaluation Reporting Standards 2022 (CHEERS 2022) Explanation and Elaboration: A Report of the ISPOR CHEERS II Good Practices Task Force. *Value Health* 2022;25. doi:10.1016/j.jval.2021.10.008.

**Table S2: Input parameters from the clinical trials for the model development**

| Parameter                                     | Intervention | Control      |
|-----------------------------------------------|--------------|--------------|
| Age in Mean (SD) <sup>a</sup>                 | 54.26 (9.12) | 54.62 (9.71) |
| Statewise transition probabilities            |              |              |
| Pre-diabetes to T2DM (1 to 2) <sup>b</sup>    | 0.04         | 0.10         |
| Pre-diabetes to death (1 to 4) <sup>c</sup>   | 0.014        | 0.014        |
| T2DM to complication (2 to 3) <sup>a, d</sup> | 0.13         | 0.34         |
| T2DM to death (2 to 4) <sup>a</sup>           | 0.004        | 0.021        |
| Complications to death (3 to 4) <sup>a</sup>  | 0.01         | 0.01         |
| Relative risk                                 |              |              |
| Pre-diabetes <sup>b</sup>                     | 0.46         | -            |
| T2DM <sup>e</sup>                             | 0.88         | -            |
| Complications                                 | 1.13         | -            |
| Utility values (mean) <sup>a</sup>            | 0.86         | 0.84         |
| Pre-diabetes (HbA1c level <6.5%) <sup>a</sup> | 0.87         | 0.87         |
| T2DM (HbA1c level 6.5% to 8.99%) <sup>a</sup> | 0.86         | 0.86         |
| Complication (HbA1c level ≥9%) <sup>a</sup>   | 0.85         | 0.79         |
| Cost per patient (US \$) <sup>a</sup>         |              |              |
| Total costs <sup>a</sup>                      | 126.04       | 68.46        |
| Total intervention <sup>a</sup>               | 34.64        | -            |
| Intensive training <sup>a</sup>               | 28.66        | -            |
| Peer support <sup>a</sup>                     | 5.04         | -            |
| Phone calls <sup>a</sup>                      | 0.94         | -            |
| Patient income loss <sup>a</sup>              | 25.66        | 18.22        |
| Medical consultation <sup>a</sup>             | 8.32         | 7.70         |
| Screening <sup>a</sup>                        | 28.62        | 26.86        |
| Medication <sup>a</sup>                       | 18.70        | 7.36         |
| Hospitalisation <sup>a</sup>                  | 5.60         | 2.90         |

<sup>a</sup> calculated separately from the main trial and informed by Dahal PK, Ademi Z, et al. Health economic evaluation alongside randomised clinical trial of a health behaviour intervention to manage type 2 diabetes in Nepal. *Global Health Research and Policy*. 2024;9(1):52.). <sup>b</sup>Data was informed by Glechner A, Keuchel L, et al. Effects of lifestyle changes on adults with prediabetes: A systematic review and meta-analysis. *Primary Care Diabetes*. 2018;12(5):393-408. <sup>c</sup>World Health Organisation. Life table by country Nepal. <https://apps.who.int/gho/data/view.main.LT62120?lang=en> (2020). <sup>d</sup>Gyawali B, Ferrario A, et al. Challenges in diabetes mellitus type 2 management in Nepal: a literature review. *Glob Health Action*. 2016;9:31704. <sup>e</sup>Thankappan KR, Sathish T, et al. A peer-support lifestyle intervention for preventing type 2 diabetes in India: A cluster-randomized controlled trial of the Kerala Diabetes Prevention Program. *PLoS Med*. 2018;15(6):e1002575.

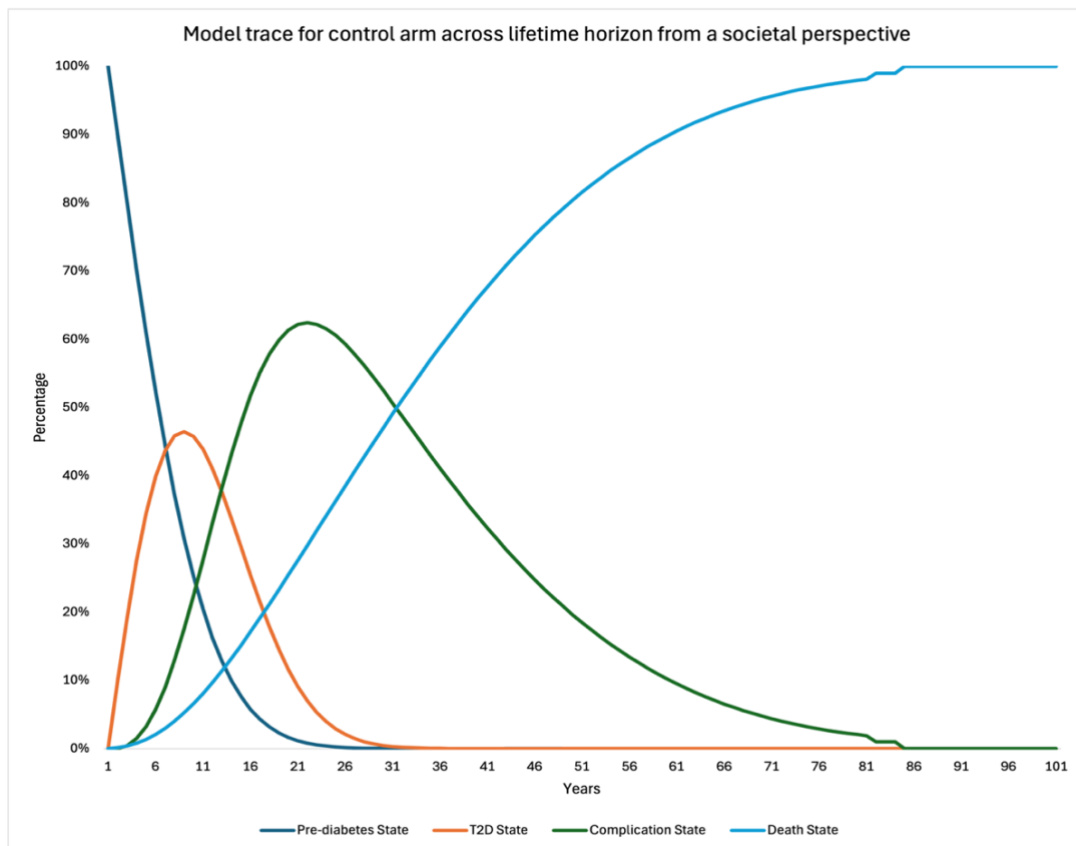

**Figure S1: Markov model trace for control arm across lifetime horizons from a societal perspective**

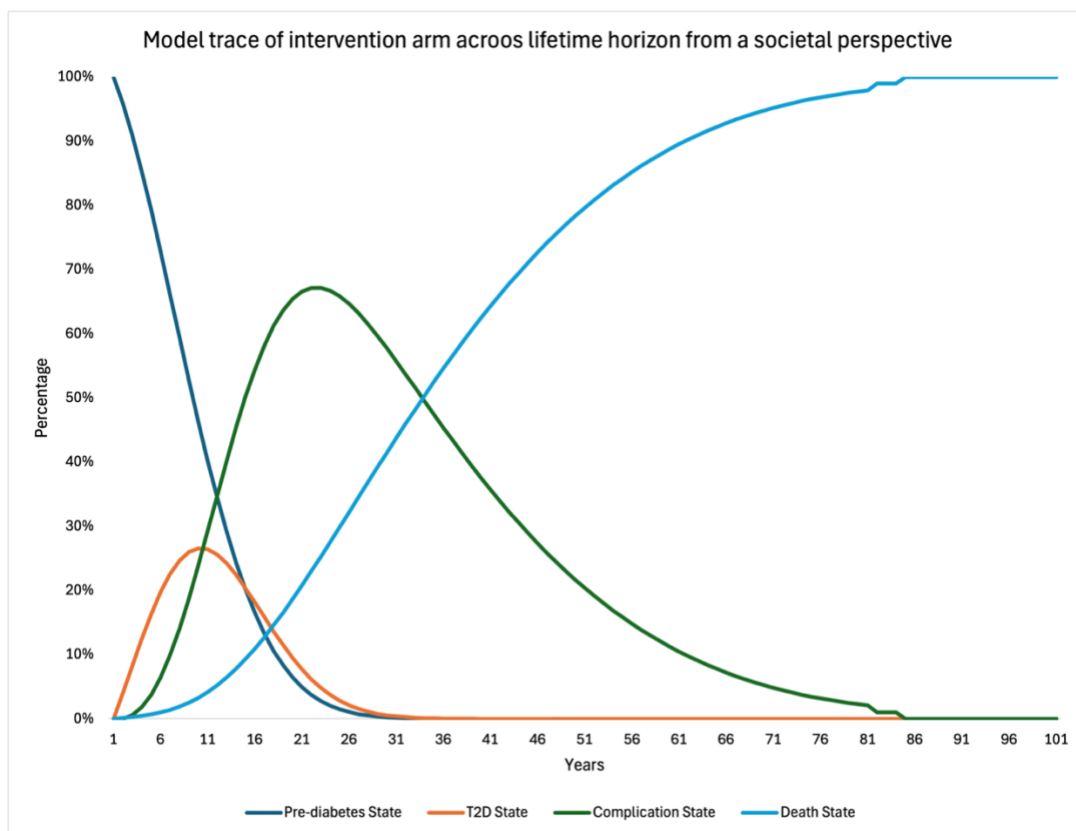

**Figure S2: Markov model trace for intervention arm across lifetime horizons from a societal perspective**

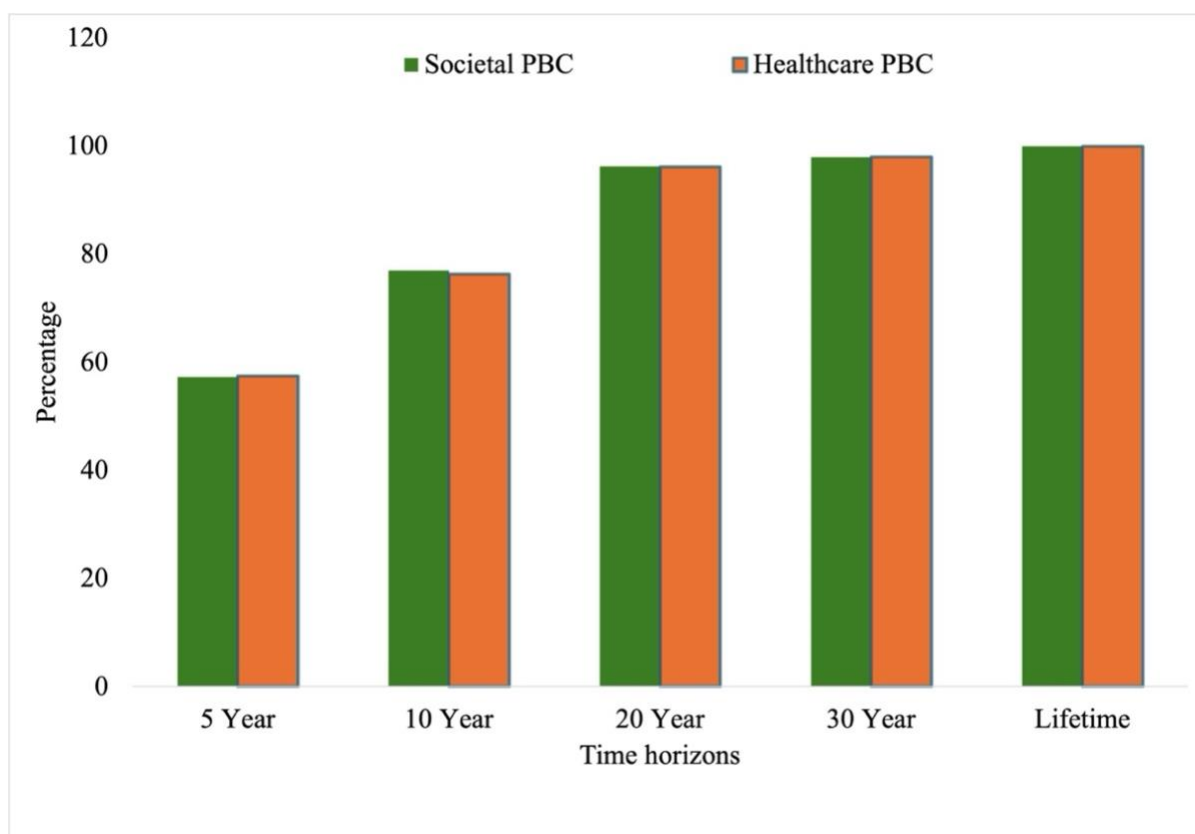

**Figure S3: Percentage of being cost-effective (PBC) across different time horizons of base case analyses from both healthcare and societal perspectives**

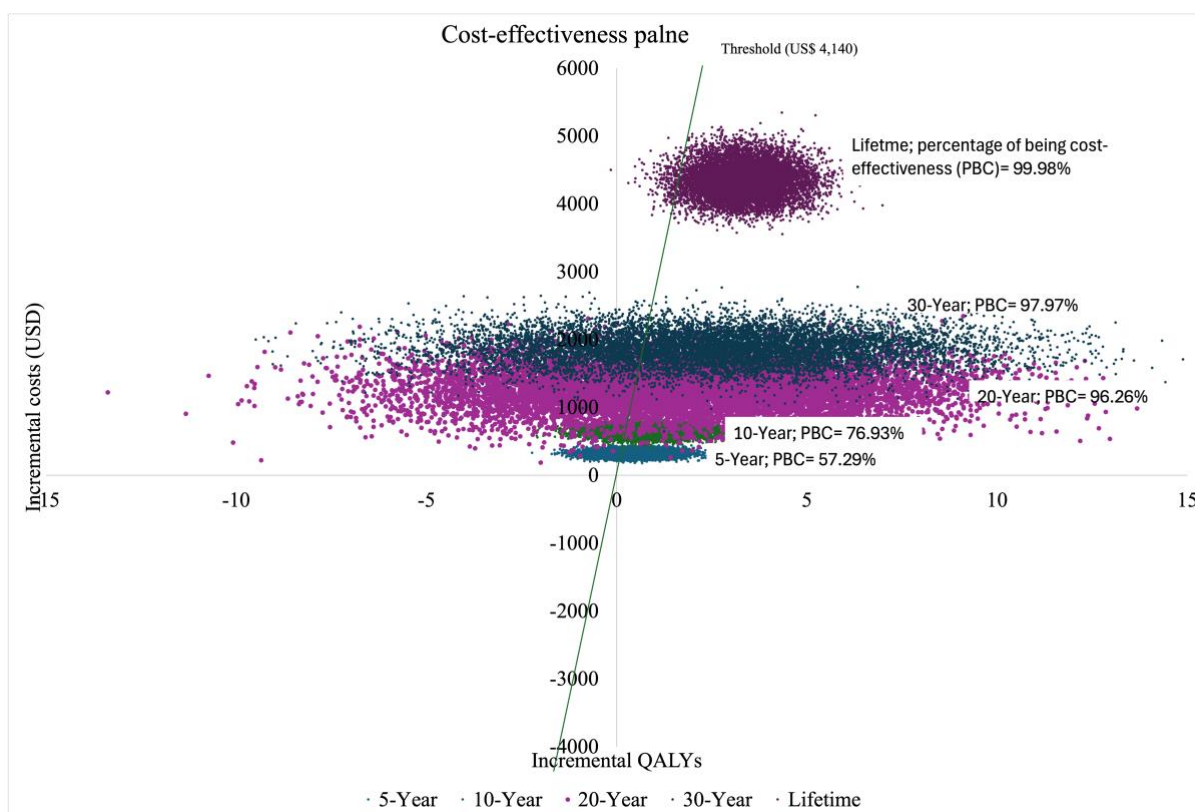

**Figure S4: Cost-effectiveness plane of 10,000 Monte Carlo simulations from healthcare perspective across multiple time horizons**

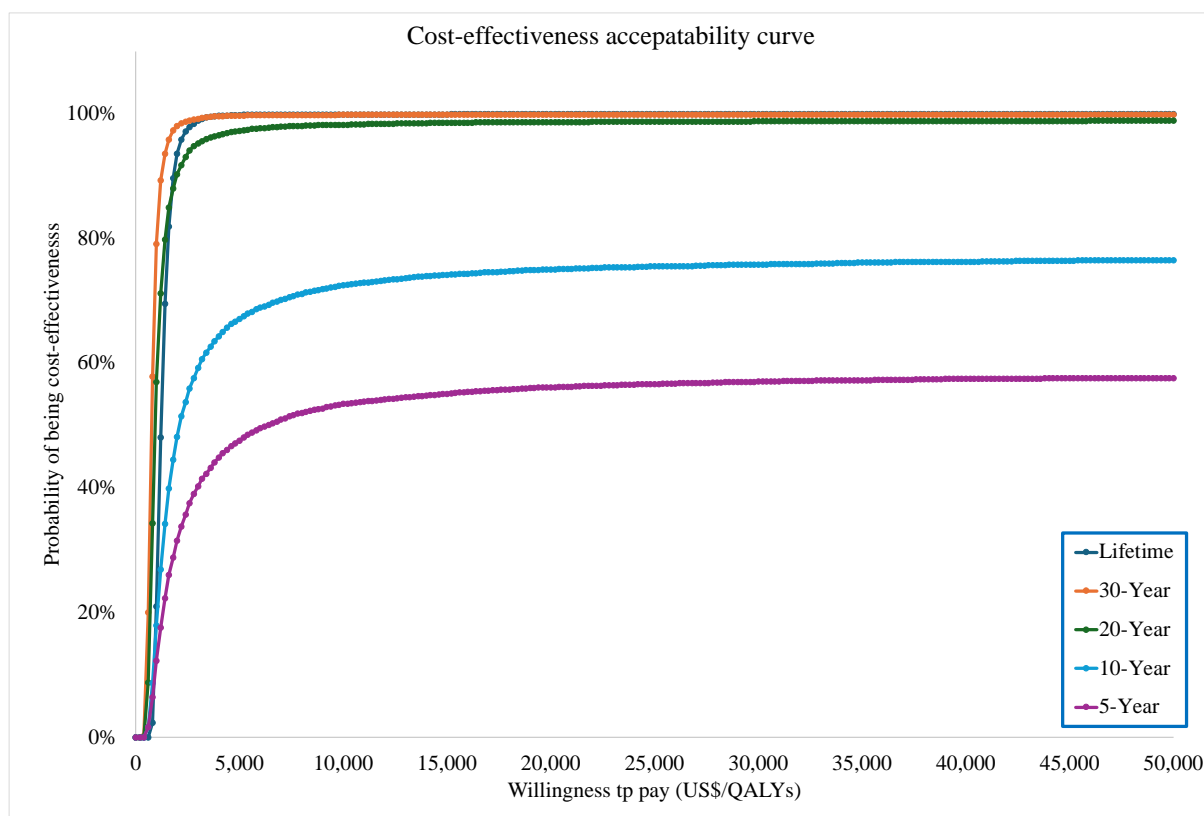

**Figure S5: Cost-effectiveness acceptability curve (CEAC) representing multiple horizons from a healthcare perspective**

**Table S3: Additional sensitivity analyses with support of literature-based data across lifetime horizons**

| Base case setting                              | Scenario setting                                         | Incremental cost (US \$) | Incremental QALYs | ICER (US \$ per QALY gained) | ICER % change from base case |
|------------------------------------------------|----------------------------------------------------------|--------------------------|-------------------|------------------------------|------------------------------|
| Base case outcome                              |                                                          |                          |                   |                              |                              |
|                                                | Healthcare                                               | 4293.00                  | 3.88              | 1106.00                      | -                            |
|                                                | Societal                                                 | 4550.00                  | 3.88              | 1173.00                      | -                            |
| Health state utility from the CoLID-Nepal, RCT | Health state utilities sourced from Hu et. al., 2020*(6) |                          |                   |                              |                              |
|                                                | Healthcare                                               | 4074.90                  | 1.86              | 2185.54                      | 97.61                        |
|                                                | Societal                                                 | 4335.30                  | 1.86              | 2325.21                      | 98.23                        |
| 3% discountiong                                | 0 % discountiong                                         |                          |                   |                              |                              |
|                                                | Healthcare                                               | 4415.69                  | 3.92              | 1212.63                      | 9.64                         |
|                                                | Societal                                                 | 5060.72                  | 3.92              | 1291.00                      | 10.06                        |
|                                                | 5% discounting                                           |                          |                   |                              |                              |
|                                                | Healthcare                                               | 1150.80                  | 0.42              | 2760.00                      | 149.55                       |
|                                                | Societal                                                 | 1191.67                  | 0.42              | 2858.00                      | 143.65                       |
| Combined health behaviour                      | Intensive training only                                  |                          |                   |                              |                              |
|                                                | Healthcare                                               | 3673.11                  | 3.43              | 1071.10                      | -3.16                        |
| intervention such as                           | Societal                                                 | 3775.11                  | 3.34              | 1130.00                      | -3.67                        |
| intensive training,                            | Phone call only                                          |                          |                   |                              |                              |
| phone calls and peer                           | Healthcare                                               | 693.21                   | 4.02              | 172.34                       | -84.42                       |
| support                                        | Societal                                                 | 1071.91                  | 3.73              | 287.00                       | -75.53                       |
|                                                | Peer support only                                        |                          |                   |                              |                              |
|                                                | Healthcare                                               | 1383.09                  | 4.27              | 324.24                       | -70.68                       |

|                           |                            |         |      |         |        |
|---------------------------|----------------------------|---------|------|---------|--------|
| Direct and indirect costs | Societal                   | 1662.58 | 3.89 | 427.00  | -63.60 |
|                           | Exclusion on indirect cost |         |      |         |        |
|                           | Healthcare                 | 4464.92 | 4.36 | 1023.25 | -53.18 |
| Starting age 30 years     | Societal                   | 3959.81 | 4.39 | 901.37  | -23.16 |
|                           | Starting age 60 years      |         |      |         |        |
|                           | Healthcare                 | 3718.34 | 1.35 | 2756.64 | 149.24 |
|                           | Societal                   | 3755.54 | 1.35 | 2784.22 | 137.36 |

\* This study shares similar population characteristics, and its model states align with our study. While their model includes five health states, we mapped their IGT, T2D, and CVD states to our pre-diabetes, T2D, and complications states, using their utility values

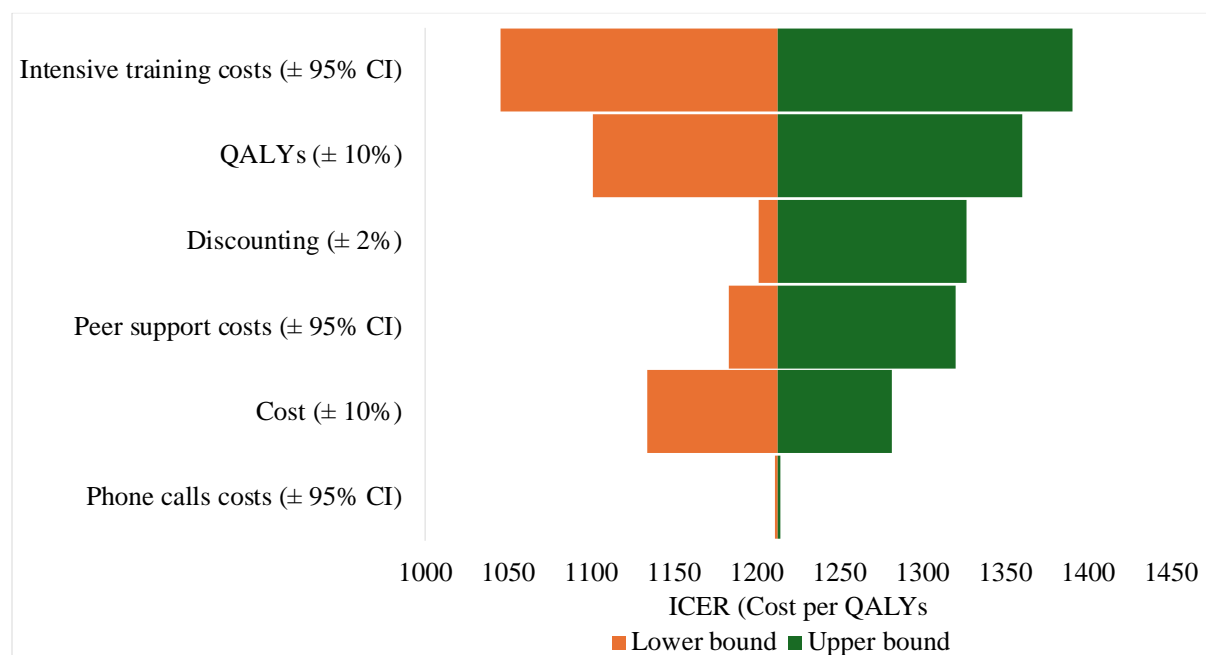

**Figure S6: Tornado analysis of ICERs in base case analysis over the lifetime horizon from a healthcare perspective**
